# Supplementary material for: Sosuga Virus Detected in Egyptian Rousette Bats (Rousettus aegyptiacus) in Sierra Leone
Source: MDPI journal article supplement (doi:10.3390/v16040648), 2024-04-22
Supplement: s1 [file s1]

Table S1. Sosuga virus-specific enrichment oligonucleotides. Enrichment oligos, 80 base pair oligonucleotides, used to generated Sosuga virus (SOSV) sequences using in-house scripts (GitHub - evk3/Nipah\_phylogenetics: Collection of scripts used for "Inference of Nipah virus Evolution, 1999-2015").

| Oligo Name (sequence-name_start_stop) | Oligo Sequence                                                                    |
|---------------------------------------|-----------------------------------------------------------------------------------|
| NC_025343_Sosuga_2012_M_0_80          | ACCAGAGGGAAAATTCAGAAGGGTCGTTCTCGATAGAGGAAGGTCCTGATATTGTGAGCCCGGAAGTGGCAAGGCTCGGA  |
| NC_025343_Sosuga_2012_M_81_161        | TCGAAATCGACTTTGAGCTTGTTCTTCCGGAGCCTCTGACTTGCCTGATTCATAAGTCAGCCTTTCTCTGTTGTTGGAA   |
| NC_025343_Sosuga_2012_M_162_242       | CCATGGCGTCCATATTCAGAGCACTTGAACAATCACTCTTGATCAGGATGGAGGGGGGAGAGGGGGATTGCTGACCAG    |
| NC_025343_Sosuga_2012_M_243_323       | CGCCTGAGACATTGCAGGCAACTATCAAAGTCTTTGTCATCAATACTCTGATCCAAATCTTCGTATAGAATGATGTGC    |
| NC_025343_Sosuga_2012_M_324_404       | TTTGCTTGCCTTAGTAGTTAGTAATTCGGCAAGAACTGGGCAGAGACATGGAGCACTCATGACACTGCTTAGCTTGCCC   |
| NC_025343_Sosuga_2012_M_405_485       | CTGCAGTGATGCAGAATCATTTTAGGACTGCTGAACGCTCACCTGACTGCCAAATCGAAAGAATTGAGGTCGATGGATTC  |
| NC_025343_Sosuga_2012_M_486_566       | AACCGGGAACATACCGCATCAGGCCCAATGCAAGAACACCGCTGACAGTAGGGGAGGTTGTTGCTCTTGAAGAAATGGCA  |
| NC_025343_Sosuga_2012_M_567_647       | ATGATATCCCAGAGGCATTGGCTAATAACACCCCTTTTATTGATGCCAACCCGAGATGGAAGACTGTGATGAACTGAG    |
| NC_025343_Sosuga_2012_M_648_728       | AATTCTTAGAGGCAATTTACAGCACCTTATCCAAGTTTGATCATGGTGTGCAAAAGCATGACCAACTTTGACCAGCCT    |
| NC_025343_Sosuga_2012_M_729_809       | CCGGGTCAGACGAACGCAGAGTTGCAAAATACCAGCAACAAGGTAGGCTGAACCAGCATTACCTGTTGCAGGGGAGAGGTA |
| NC_025343_Sosuga_2012_M_810_890       | GGCGAAGAATACAGGTAGCAATAAGAGAGAGTCTTCCAATCAGACAATTTTATGTCATGAGCTCCAGATTGCAAGCAAC   |
| NC_025343_Sosuga_2012_M_891_971       | AGGGACCCATTACAGGCAAGTACTATGCTATGGTTGCAGACATTGGTAAATATATTGAATGCAGGAATGGGAGGCTTC    |
| NC_025343_Sosuga_2012_M_972_1052      | TCATGACAATTAGGTTTGCTTTGGGACAAAAATGGCCACCGTTAGCTCTTGCTGCATTCTCAGGTGAGATTGTCAAGATT  |
| NC_025343_Sosuga_2012_M_1053_1133     | AAAGTCTCATGTTACAGTATAGAAGGTTGGGTGAGAGGGCCAAGTATATGGCTCTTTTGGAGATGTCAGAAATGATGGAT  |
| NC_025343_Sosuga_2012_M_1134_1214     | TTGCAGCAGCAAATTTCCCACTCTATACAGTTATGCAATGGGAATCGGAAGTGTCCAAGATCTCAAATGCGAGGCTAT    |
| NC_025343_Sosuga_2012_M_1215_1295     | CATTTGGCAGACCTTACTTGAATGCTGCATTTTACCAATTGGGGGTTGAGACTGCCAATCAGCAGCAAGGCTCAGTGAC   |
| NC_025343_Sosuga_2012_M_1296_1376     | AGGAGATGGCAGAAGAGTTGGGACTCACCGAAGCAGACAAGCGGGCAATGGCGGCCACTGTTGCACGACTCACAACAGGA  |
| NC_025343_Sosuga_2012_M_1377_1457     | GAGGACAACAAGGAGGCAACATTGGGGTCAATGCAATGGCTCGGAGAGGGCAAGCCCAACCGCCAGACAGCAAGCAATT   |
| NC_025343_Sosuga_2012_M_1458_1538     | ATAATCTAATTGATGAAGAGGAAGAGGATGAAGAAGAAGAAGAGGAAGAAGAGCAGAATCTTGATGCAGAAATAGAAAGA  |
| NC_025343_Sosuga_2012_M_1539_1619     | GATTTGCACTCAGGTTAGCACAGGAGCAGGAAAGATGGGGACGCCGCTGGCCGAAGTGAAGCCGAAAGGGCACAGACA    |
| NC_025343_Sosuga_2012_M_1620_1700     | GACAAGGGCCAGGGGCAGCAGCCAGTCTGGGCAACACCAAAACCAGACAGACAATGACCAATCAGAATACAACAGCAAT   |
| NC_025343_Sosuga_2012_M_1701_1781     | TCGAGAATAGCAAGGCTTTCAAACAACGAGCGGGCTTGACAGCTTATACGCATTTTCTTGCACTTACAGTTATAGGCT    |
| NC_025343_Sosuga_2012_M_1782_1862     | TTAAGAAAAAACTACTATAGGCCGAAGGTTGGCAACTTCGGGCCCCCTCAGCCTTGCTCCAAGGCGCCCCCAAT        |
| NC_025343_Sosuga_2012_M_1863_1943     | CACCCACAAGCCAGCACTAACAGCCACAGCACAACTGACAGAAAATGGACCAGCCACCATCAGATGCGGAAATTTCCGCC  |

|                                   |                                                                                   |
|-----------------------------------|-----------------------------------------------------------------------------------|
| NC_025343_Sosuga_2012_M_1944_2024 | GGATAGAGAGGGGACTGGCCACTGCCAGGCACTTCGCACCAGGCCAGTCACGTCCCAAAGCAGTCTTGGGAAGTCCACC   |
| NC_025343_Sosuga_2012_M_2025_2105 | TCAAGAAGGGAAACACAAAACAATTGGTTGACTCCGCGGAATTCACCGCCGCAACACTGGCGCCCGCAGGAGGACTGCAG  |
| NC_025343_Sosuga_2012_M_2106_2186 | GATCAATGCCCTGCTCGATTCCAGCAGGGCAATCTAAGGCAGGGCAAGGCGCCCGCCAAAGGTTAAGAAAGCTGCCAA    |
| NC_025343_Sosuga_2012_M_2187_2267 | CTCGAGCGACGCCCACTAAACCTGATGCTCCTACAATTGAACCACTGTATGAGGACATAGTATCCACTCCTGGTAGAGAC  |
| NC_025343_Sosuga_2012_M_2268_2348 | AAGCACAAGTGCAGCTTCCATCCCCAAATTGAGCGCAAAAGACAACTCCTATCGGCCCGCCACTCCAGCAACATTCC     |
| NC_025343_Sosuga_2012_M_2349_2429 | ATATCCCCACTGGTCCGAGGGACAAAACCTTTAAGAGGGGGCTGTCCTCAGGAAGCGCCGCCTCTATTAGAAGAAACCCC  |
| NC_025343_Sosuga_2012_M_2430_2510 | ATCCAGGACACAGACGAGAGTTCGATCTTGATGTTGGGAGGAGGATCATTACAATGCGAGAGTGGTGCAATCCAACCTGC  |
| NC_025343_Sosuga_2012_M_2511_2591 | GTCCAATCACACCAATCCCCAGGAGACATCACTGCAGATGTGGTCACTGTCGAGTCTGCAAACAGTGTGAAGGAGAT     |
| NC_025343_Sosuga_2012_M_2592_2672 | ATCAGGTACTTGAAGGTGATGGAGAACAAGATGAACCAGCTGGAGTGAAAAATTGACAAAGTATTGGCTCAAAACAATAT  |
| NC_025343_Sosuga_2012_M_2673_2753 | ATACAGCAGATTAGGAACGAACAATGTTCTCAAAGCAGGGATGGCTACACTTGAAGGGCTGATAACCACGATAAAAAAT   |
| NC_025343_Sosuga_2012_M_2754_2834 | ATGGATCCCGAGTCGGCACGGGAGCTGACGCTGCTCAAGCAAAGCGTGCATTAAAGGATGTGCCAGTAGTAGTCAGCGG   |
| NC_025343_Sosuga_2012_M_2835_2915 | CCTGTTATTGGGGAGAATGATCTCATCTTTGAGTCCAACTAGAAAGTCGTTAATCTAGGAAGGCCCTCAAAGGTCAATCC  |
| NC_025343_Sosuga_2012_M_2916_2996 | ACACCCCGACGCCGTGGAGTCCCGACCGAATCCGAATTGGCAAGTTACAAATTGACTCTAGCAAAGTTACTCAAAGACTG  |
| NC_025343_Sosuga_2012_M_2997_3077 | ATCCCTAATAACACAGCACAAATCAAAGTTCCTTGACGCGATTGAAAAGATAAAAACTGAGGCTGACTTTAAGGCGCTCAA |
| NC_025343_Sosuga_2012_M_3078_3158 | CGAGAGATAGTACGTGCTGCAGTGTGAAAACCTGTCATTGACTATCGCTTCATATCTCAACACTTTTTGCAATCTTAGCCT |
| NC_025343_Sosuga_2012_M_3159_3239 | ACTGGTTTCTCTGCTTGCACTATCCGCACAACATCTCAAAACAAAAAGCATTACCTCTGTTATTGCAAATGCCAACAC    |
| NC_025343_Sosuga_2012_M_3240_3320 | AAAAAATCATAACCTGAAGGTCTTTAAGAAAAAACTAAGGTGGGTCCGAACCCGTTTCGACCCGACCGACCCCAAAATG   |
| NC_025343_Sosuga_2012_M_3321_3401 | CGCACCGCCAAGCAACGATTCTGTCCATGTGGATCACCACAGTGAGAAGAATCATCTCCGTGCTTTCCCGATTGTCCAA   |
| NC_025343_Sosuga_2012_M_3402_3482 | CGGATTACCTGAGGGCAGAGAAAAGGGGCGGTTAATTAAACAGATGAGATTCAAGGATCTAACTCCTAGGGGCTCAACT   |
| NC_025343_Sosuga_2012_M_3483_3563 | AACCCCTATATCATTATAAACACCTACGGGTTCATAAAACCACTTAGGACCAGAGAGGAATTCTTCTCAGAGTTGCAT    |
| NC_025343_Sosuga_2012_M_3564_3644 | AGCAATCACAGACCCCTGTCTCACTGCATGCAGCATACCATTCGGAGCAGGCCACGCGTGGATCATCCGAAAAGACTC    |
| NC_025343_Sosuga_2012_M_3645_3725 | TGGACGAAATTGAGAAGGCTTAATAGTTGTGAGGAAGAGTGCCAGCACAAAGTGAGGAGTGTGTATTGAAATCAGGAAA   |
| NC_025343_Sosuga_2012_M_3726_3806 | TTCCCCGATGCTGACCAGGCACCAGCTTGCGGGGAACAAGATCCTATGTGTTCCATCTGATAAATATGTTAAGGCTCCT   |
| NC_025343_Sosuga_2012_M_3807_3887 | GGAAATTGACCTCAGGTGTGGATTACGCTTACCACATTGTCTTTATATCTGTGCACACTGTGCCCTCTAGTCAAAAATTC  |
| NC_025343_Sosuga_2012_M_3888_3968 | GGGTACCTATGCCGTTCCAAAGCTTGCGTGCAAAAGTCATGAGGAGTGTGCATTGGAAAGTCATGTTAAAGATTGACTGT  |
| NC_025343_Sosuga_2012_M_3969_4049 | ATCCGGGTTCCCCTATAACCAAAAATTTGATATATGATTCTGAGAATGATGTTTGGCTTGCTTCCATCTGGTTCCATCTA  |
| NC_025343_Sosuga_2012_M_4050_4130 | GTAATCTATACAAAGGCCATAAGCCCTTCAAAGAATACGATGACCATCATTTTGCTGCAAAGTGCAGGTCAATGAAACTG  |
| NC_025343_Sosuga_2012_M_4131_4211 | AAGTAGGGATTGTTGATCTATGGGGTCCACGTTTCTTGTTAAGTCCCACGGGAAAATACCCCATGCAGCTCGGCCTTTC   |
| NC_025343_Sosuga_2012_M_4212_4292 | TCGGAAGCATGGTTGGGTCTGTATCCATAATGGATTGTGCACCTGCAATTTGCAAGTCATTGTGGGCACTGAGTGTA     |
| NC_025343_Sosuga_2012_M_4293_4373 | CTATTGTGCAAGTAAGTGCAGTCCTACAGGCATCAGATTGTCTCAAATGGTCCGAATGACAGATGTGATTTCCCGAAA    |

|                                   |                                                                                   |
|-----------------------------------|-----------------------------------------------------------------------------------|
| NC_025343_Sosuga_2012_M_4374_4454 | TAAAAGTTAATCCGGACCTACACGGCCTTGCCAAATCCAGATGGAACCCAGTAACCAAAATAGTCAGCCCCGAATAAAGA  |
| NC_025343_Sosuga_2012_M_4455_4535 | ACCACAAC TAGGTGCAACAAAAGCATCAAGAACCTGAGACATCCCCAACATTCAAAGACAGAGTCCAAACCTCGGCAT   |
| NC_025343_Sosuga_2012_M_4536_4616 | TGACCCATAATCAATATTGCTGCAAGACTGCATAGAAATGCTTCTGCTCTAAGCTATAGCGGTAGCCTGCAAGTTAATAG  |
| NC_025343_Sosuga_2012_M_4617_4697 | AAGAGCTCTCACATCACTATCTGCATTATCAAATCTGCACACTCATTCTCAACGCTTGCTTTACCAATCTTCAGATTTA   |
| NC_025343_Sosuga_2012_M_4698_4778 | GAAAAAACCTAATCTCAATTACAAATGCAGAATTGAGCAGTCTAAATTGGGTCCGAACCCGTTCCGACCCGAACCCGAGA  |
| NC_025343_Sosuga_2012_M_4779_4859 | ACCAAGCGAAGACATCCACTCCCCCCCCAACCCCAAAGGAAGCCGACTCCAAAAAGAGGACTCCACACAATGGCACACA   |
| NC_025343_Sosuga_2012_M_4860_4940 | AAACTCATTAAATTTACTTCTAATGTTGACAGAGACAGGGAGTTCTGTGAATATTCAGCTGCTTCAGTCACTGGGAGTAA  |
| NC_025343_Sosuga_2012_M_4941_5021 | CAACACTCATAAACGCCAACTTGCAATTTATAATCAACAACCTCCGTCATACCTCGTAATTAGACTTCTGCCGACACTAA  |
| NC_025343_Sosuga_2012_M_5022_5102 | TATTCTAAGCAGAATTGCACTCTTAATAGTATTAACAGGTATGAAAAGGCTGTCAAAGATATAATAAAACCCATTAGTG   |
| NC_025343_Sosuga_2012_M_5103_5183 | CAATCTCAATTGGCTTTCTGACAATTTAATTCAAAAAGAAGAGGGAAAAGATTTGCGGGGGCAGCTATAGGACTTGACAG  |
| NC_025343_Sosuga_2012_M_5184_5264 | ACTCGGTGTTGCAGTTGCTGCACAGGCAACAGCTGCAGTAGCTCTAGTGGAAGCCAGAGCAAATGCAGAGAAGATTTCTT  |
| NC_025343_Sosuga_2012_M_5265_5345 | AATGTCAGCAGCCCTACAAGAGACGAACCAAGCTGTCTCTTTGACAGCTGCCATGGCGAGTAGTGGTATTGCAATTC     |
| NC_025343_Sosuga_2012_M_5346_5426 | AGCAATACAGAATGAGATCAATAATGTGATTATCCTATTCTCAACCAGGTACAGTGTGGGGTACTAGACTCACAAATTG   |
| NC_025343_Sosuga_2012_M_5427_5507 | ATCCATCTTAACTTATATCTCATAAAGATCACAACTCTTTAACAATCACTAACAAATCCTGCTCTCCATAGAATAT      |
| NC_025343_Sosuga_2012_M_5508_5588 | GATCCAGGCATTGTCTGTTCTAATGCAAAGTACTAAAGACTCACTCAAAAACCTCACAGCCGGAGATACCCAAACCTCAC  |
| NC_025343_Sosuga_2012_M_5589_5669 | GGATCTGATAAGAACCAATCTAATAGAGGGCCAGATTGTTGCAGTCAACATGACAACGCTTCAGATGGTTATAGCAGTGT  |
| NC_025343_Sosuga_2012_M_5670_5750 | CATCCCGGCGGTTGCGAAGTTGGAGTCAGCTGTCTCTTAGATTTTATTCAATTACTGTCAGCTCAATCAATCTGAGG     |
| NC_025343_Sosuga_2012_M_5751_5831 | AATGCTGCAGCTGCCCTCAAGAATATTAGAGGTCGAAATAACATATATACGTTTAAGGGAGATCAGTGCACATTAAGT    |
| NC_025343_Sosuga_2012_M_5832_5912 | AACTACAGCTTACTGCTTATACAGTGATGCTGTCCCTGTCAATGAGAAAAATTTCTGATTGCATGAAGGGAATTCAAAGCT |
| NC_025343_Sosuga_2012_M_5913_5993 | CTGTATATTTACAAGGATCATAGGCTCCTTTGCTAATAGATTGCCAGTGTGAATGGGGCAATATTGCAAATTGTAAGA    |
| NC_025343_Sosuga_2012_M_5994_6074 | TTTAACATGTTCTTGTAACCAACCTGATGGGTTAATATATCAGCCCGATAATGTACCCTTGACAATCATTGACAAAATTA  |
| NC_025343_Sosuga_2012_M_6075_6155 | ATGTTCAAAGTTGAATATAGGACACCTGACCTTTAATATAAGAGATAGCACAAATGCTACTATTGATCTACATACTGATC  |
| NC_025343_Sosuga_2012_M_6156_6236 | GTCCGATTCTCAGATTACTATTACAAATCCTCTTGACTTATCCGCAGAGCTTACTCAAATTAATAATTCGGTAATTAATT  |
| NC_025343_Sosuga_2012_M_6237_6317 | CCACCTGCATCTTATGAATAGTGAATATATTGAGAAGAATTGATAGTGGACTATTAGCAAGGCGATAATGATCTTCT     |
| NC_025343_Sosuga_2012_M_6318_6398 | GCTTGTGGGGTCTGCTCTTTAATTATAGTTGTTATAGGCTTATAGTCTGGATTAGGTTTATACTCCTCCATTAAAGA     |
| NC_025343_Sosuga_2012_M_6399_6479 | TTCTTCACACACTAATCGCCAAGGAAGCAGTTATTTCTATTGATAGTGATAACAATAGCAGTAGATAGAACATTATC     |
| NC_025343_Sosuga_2012_M_6480_6560 | ACTACACAGGTTGCCTAATGCATAATAGGCTTTCAACCACTACTCTCTATAAGTAAAAATCTGTTTAAATAAAAACT     |
| NC_025343_Sosuga_2012_M_6561_6641 | ACAGTAAAAGTCAGGTAACCTTGGGCTCGACCCAGTCAGCCACCAGCCACAAATCCCGAACGGACAGGGTCTGCCCTCA   |
| NC_025343_Sosuga_2012_M_6642_6722 | CAAGAACACCATGCATGCCAGAACTCATCAGTCAGTAGCATCAGTGATTCCATCGACAATGTGTTTGGGAAAAGGAACA   |
| NC_025343_Sosuga_2012_M_6723_6803 | TCCTGTAATCAAAGGACAGGAAAAAATTATTTAGACTAGGCTCACTCATATTTCTAATAGTAATAATTAGCCTAACAG    |

|                                   |                                                                                   |
|-----------------------------------|-----------------------------------------------------------------------------------|
| NC_025343_Sosuga_2012_M_6804_6884 | TAAGATAATAACTGAACTCTCTAGTTAAGAGTGAGGTAGCAATAGAGACCATGTTACCGAAATAATCAATTTGCAGC     |
| NC_025343_Sosuga_2012_M_6885_6965 | AAAAGAACTCAGTCTGATGAATAACATCATAACAACCTTGAACACATTATTAACAACAACCACGGTTGACCTCCCGATTA  |
| NC_025343_Sosuga_2012_M_6966_7046 | ATTGACTAACTTTGGGAAAAGTATAGTTGATCAGGTGACAATGATGGTTAGACAGTGCAATGCAGTGTGTAGGGGCCCTG  |
| NC_025343_Sosuga_2012_M_7047_7127 | TGATAAACCAACCCAGAATATCCAATTATTCAACGGGCGCTACGCTATAATAATAATTCAACAGCATATCCATCAAGAA   |
| NC_025343_Sosuga_2012_M_7128_7208 | TAGTATATCTGAACTTAAAGTACCAAGAGACTTTGTGCCTTCACCAGGCACCTTCCATGGGTGTTCAAGATTCCCGTCGT  |
| NC_025343_Sosuga_2012_M_7209_7289 | TAGTAACCATTATGGGTATGGTGTATAGTCATACTGTATCAAATGATACTTGTGACGGGTCTAATCCGCTGTGCCAAA    |
| NC_025343_Sosuga_2012_M_7290_7370 | CTTGTCTGTAGGGAAATTAATTACAGGGGATAATGGACAACCTGAACACAAGACTCTTTACACTCAGCAACTAAGCCAAA  |
| NC_025343_Sosuga_2012_M_7371_7451 | AGATCGGTTGTATCATTGCTCAGTGACTATGACCACTTTAGGTTGTTACATTTTATGCTCAAAGCCAAGGTTAATGAGA   |
| NC_025343_Sosuga_2012_M_7452_7532 | CCAGGATTACGAGACAATAGGGATAGAGCCCATGATAATAGGTATGTTAGGGCTTGACGGAGTATATACTGATCTGGGTA  |
| NC_025343_Sosuga_2012_M_7533_7613 | CCCTGTAGGAATCTCTGACAATAGCTTATACGCAATGTATCCAGGCCCGGGGAGGTGTGATGTATAAGGATTTTTTGG    |
| NC_025343_Sosuga_2012_M_7614_7694 | CTTCCATTGCATGGAGGGGTTAGATTCTCTGAGGCTTCCAAAATGTTAGGGAAGAACATCACTTTTCGGGGCTTCCCTC   |
| NC_025343_Sosuga_2012_M_7695_7775 | TAGTGACACATGCACTGAGCATGAAAAGAGCCTGACCCAAGAGCCGGCTAATATGCTAACAAGTCCTTATTACGGTGAGG  |
| NC_025343_Sosuga_2012_M_7776_7856 | TTTAGTTCTTGACTTTCTTTATGTGTGTACGTTATTGGATAACATACCTGGGGAGTGTAGTATACAGTTAATTCCTCTG   |
| NC_025343_Sosuga_2012_M_7857_7937 | CAACATGACAATGGGCTCTGAATCAAAATTGTACAAATTGAATAACTCATTGCTACTTTATAACGAAGCTCATCTTGGT   |
| NC_025343_Sosuga_2012_M_7938_8018 | GCCTTATACAGAAGTATACCAACTAAGTCTAAGGGTGTCCAAAAATAGCATGAAAGTGCGTGAATCAGTAAGGCTGAATA  |
| NC_025343_Sosuga_2012_M_8019_8099 | CACCTTCTACTACTAGACCTGGAGTAGAAGGATGCAACATCAACAAAGTATGTCCTAAAGTATGTGTAAGTGGAGTGTTTC |
| NC_025343_Sosuga_2012_M_8100_8180 | GGCACCAGGAATTATAAGGAAAGCATTGAGTCCAAAGGAGTCTAATGAGGATCTGTTGTTTTCCAGGCCTGGACTTCAG   |
| NC_025343_Sosuga_2012_M_8181_8261 | TTCTATAGCACGCCAAGGTCCCTTATATCTCTATGTAGGGCTGATTGATGTGTACTGACCATCCCGCTAGGCAATTCTG   |
| NC_025343_Sosuga_2012_M_8262_8342 | TGTTTTTCATTGGATACACAGATTCATTCTGTCTATCAGATAGAGATAATGAGAAGATCTACTGTGTTGCATTATTAGAAC |
| NC_025343_Sosuga_2012_M_8343_8423 | AGATAACATGCCTTACTCTGAGATGACAATCAGATCTTTTTTGTACCTTATCAAATAACAATGTAAGAAAGAGAGTCACT  |
| NC_025343_Sosuga_2012_M_8424_8504 | GAACATACAACATGCTAGGAGCTCAGGTTACATGGTAATTATCTAGAGTAGGATGCAAAGCAATTTTAACTTCTTGATG   |
| NC_025343_Sosuga_2012_M_8505_8585 | CTCACTCATAATATTAACCTTCTCGACTCAACTATCCCCAAGAAAAAGCTACGCTATGCTTAAATCTTCTTTAAGAAA    |
| NC_025343_Sosuga_2012_M_8586_8666 | AAGATGGGCCAGAATGGCTGCCCGGCCAGATCATCCTCCCTGAGGTGCATCTGGACTCTCCCATGTTGAGAACAAAGT    |
| NC_025343_Sosuga_2012_M_8667_8747 | GCTATACCTAATCCAACCTGGGAGAATTACCAACTTATGATTACTACTACAATCATGACTATTTCCAGGCATTGATTGGA  |
| NC_025343_Sosuga_2012_M_8748_8828 | CCGAATCAGGCATGAAGAAAGTAAATATTCCAAGACTGAGTGAAGTAAAGGAGAGACTATTGGCCAAATGTCATCTT     |
| NC_025343_Sosuga_2012_M_8829_8909 | TCAAAGAAAACGAAAAACCTGTCTTAAATTTCAATCCTGTACCATGGCCGAAATGCATGACTATACTGCACAGAGTAA    |
| NC_025343_Sosuga_2012_M_8910_8990 | CATCAATTCGTCACTTGAAAGATTAAAGATGCAGAACATATAATCAGTCATGCATTAGCACCGTTGTCACCTGGCCTCA   |
| NC_025343_Sosuga_2012_M_8991_9071 | AACCCCTCTAGAAGATGTGTCAAGCAAAATTACAGGGAACAAACCTATTCCAACAAATATTAAGTCCTGTAGTTTTTC    |
| NC_025343_Sosuga_2012_M_9072_9152 | CCCGAATCATTCTAGACCCAATTCTGTATGCACATTGCCACAAGTGCAATCCAAGTGGAGTGGAAGGACAACCTCAATC   |
| NC_025343_Sosuga_2012_M_9153_9233 | ATGGTTTTTGATAAGGCATTAATGAGACAGCTAATTATGAGGAATAGTGAGGGCCACACAGATTACACCTGTAGAGA     |

|                                     |                                                                                   |
|-------------------------------------|-----------------------------------------------------------------------------------|
| NC_025343_Sosuga_2012_M_9234_9314   | TGATGATAGGATTATGAGTGTGATCATTACACCAGAGTTAGTAACCATTTGGCTATCAGAGAACAACACAATCATTATC   |
| NC_025343_Sosuga_2012_M_9315_9395   | GACTTTTGAGATGGTCTGATGATCACTGATCTGTATGAAGGACGAATGAACATGATGCTCTAACTACCTTAAGCTGTT    |
| NC_025343_Sosuga_2012_M_9396_9476   | TTTGGCACCGCTTAAATCAAGGCTAAAGCAGCTGTTTCATCATTGTGGATGACTTAAGTTCCATCATAGGGAATTCAGTTT |
| NC_025343_Sosuga_2012_M_9477_9557   | CTCCATTGTTGCATCTATGGAAGTTTAGTGTATGGTCAACTCCAACCTTTCTGATCCTGTACCTGATGTAGCAGGTGAAT  |
| NC_025343_Sosuga_2012_M_9558_9638   | CTATTCCTTTGTGTCGGAGAAATGTTAACAGCACTGACAGATACAAAAGAATTCACAACAGATGAGGCTAGAATTGTAG   |
| NC_025343_Sosuga_2012_M_9639_9719   | GGAAAGAATTACTGAGTGTATGAGGATTTAACACCGGACTTGATTGCTGAAGTCTGTGTGCATGAGGATGTGGGGTC     |
| NC_025343_Sosuga_2012_M_9720_9800   | CCCATCTTTGAGTGCAGAAAAAGCTGCTGAAAAGGTGCGAAAATCTATGTGTGCTCCAAAGATAATAGATTTAGAAACAA  |
| NC_025343_Sosuga_2012_M_9801_9881   | TCTGAAGACACTTGCTTTCTTTTCATGGAATATTGATCAATGTTACAGGAGGAAGCATAATGGGATTTGGCCTAAATGTA  |
| NC_025343_Sosuga_2012_M_9882_9962   | ACTTCCACCAATGCAGGAGTAAGCCTGACTGAGATGAAGCATGACAATTCTGAGCTCCACATCAGTACATCCTAAATC    |
| NC_025343_Sosuga_2012_M_9963_10043  | TTGGAAAGAGATTGCTTTTATAGAATTTGAGAAAAGCTTCGATTGAGCCAGGTGATGACTTGAGTATATTCATGAAGG    |
| NC_025343_Sosuga_2012_M_10044_10124 | TAAGGCTATTAGTGCACCAAAAAGTGACTGGATGAGTGTGTTGAGGAAAAGTCTCATAAAACCAACTTGAGAGCGGTTAC  |
| NC_025343_Sosuga_2012_M_10125_10205 | TGCGCAATGCCAAGGCCATTTAATAGGCGGTTATTGCTAACTTTTTGGCAGACAGCAACTTTGATCCATCCAAGGAGT    |
| NC_025343_Sosuga_2012_M_10206_10286 | AGAGTATGTGACAACCTGGAGCGTACCTTGAAGATGAGGAATTTGTGCTCTACTACTCAAAGAGAAGGAAATAAAGG     |
| NC_025343_Sosuga_2012_M_10287_10367 | GACAGGAAGAATCTTTGCAAACTAACAAAGAACATGAGATCCTGCCAAGTAATGGCAGAGTCACTCCTGGCCAATCATG   |
| NC_025343_Sosuga_2012_M_10368_10448 | AGGCAAGCTGTTCAAAGAGAACGGAGTTGTTCAAGATAATTTAAATCTTACCAAATCCTTGTTAACAATGTCCCAGATTG  |
| NC_025343_Sosuga_2012_M_10449_10529 | ATTGATCTCCAGACAGTCAAGACGAAACATTAGAGAGAATGTGACAATCCTTCACAAAGTCACAAAAACCATCACAAA    |
| NC_025343_Sosuga_2012_M_10530_10610 | GTTCTCATCTGCCCGAGCACTAAAAGTGGACAAAAGTCACAGCAAGACGAGCAGTTTGAGATTGCAGCTTTTATCTGA    |
| NC_025343_Sosuga_2012_M_10611_10691 | TACAGATCTTGAGAAGTACTGTCTCAATTGGAGGTACCAGACTATAATTATGTTTGCAACATCAATGAATAGACTATATG  |
| NC_025343_Sosuga_2012_M_10692_10772 | TTATCTCACTTATTTGAGTGGATTATCCCCGACTAATGAGGTCAACACTGTATGTCGGAGACCCTTTTAAATATGCCAC   |
| NC_025343_Sosuga_2012_M_10773_10853 | CTACCTTGATACAACCTGATCTTGACTTAGTTAAGAATGAAGGTATTTTCATAGTCTCCCCAGAGGTGGTATAGAGGGTC  |
| NC_025343_Sosuga_2012_M_10854_10934 | GTGTCAGAAACTCTGGACAATGATTTCCATATCTGTCAATATCCTTTCTGCAGCTGAATCCAATACAAGAGTAATGAGCA  |
| NC_025343_Sosuga_2012_M_10935_11015 | GGTACAAGGAGACAACCAGGCAGTCGGTATTACCACCAGAGTTCCAAGATGTGTAAGTACAAAAGAGAAGAAAAGGATTG  |
| NC_025343_Sosuga_2012_M_11016_11096 | TTTCGAGAACAGCAAGGCATTTCATTGAAGGTTGAGAGTGAACAATCATAATTTAGGGCACCCTCAAGAGTCAAGAGA    |
| NC_025343_Sosuga_2012_M_11097_11177 | TATACTCAGTTCCTCTTTTTTGTGTATAGTAAGAGAATTTCTCAAATGGCAGGATACTTAATCAGGCTCTTAAGAACA    |
| NC_025343_Sosuga_2012_M_11178_11258 | GAGCAAAGCCAACCTAATATCTGATGTCTTAGGTGAGTGTACCAATCTTCATGCTCAAACCTAACAACTGATGA        |
| NC_025343_Sosuga_2012_M_11259_11339 | ATTGACTGAAAACGGTGTAGAAAAGGACATCTGTTACTGGCTCAGCTTTTCCTTTCTGCTAAACAGCTTGTTATGATC    |
| NC_025343_Sosuga_2012_M_11340_11420 | ACTGTTCCCTCTGCTAGCTCAATTCGAAGATGAAGTGACATCTACATACCTTAACAACCCACATCTGATCGGGAGACTTT  |
| NC_025343_Sosuga_2012_M_11421_11501 | TGCTATTCCCTCTCAACTGGGTGGTCTTAATACTATTCTTTAAGTAGACTTTTCTGTAGGAATATAGGTGATCCCCTGA   |
| NC_025343_Sosuga_2012_M_11502_11582 | ATCTGCAACAGCTGACCTCAAGAGGCTGATTCAACATGGAGTTCTACCAGAGTGGTATCTCAATAATCTTTCAAAAGGA   |
| NC_025343_Sosuga_2012_M_11583_11663 | ACCTGGAGATGGTAACTGGACTACCCTTGCAGCTGACCCTTATGCTTTAAATATTGACTACATTACCCTCCAACCTCCT   |

|                                     |                                                                                    |
|-------------------------------------|------------------------------------------------------------------------------------|
| NC_025343_Sosuga_2012_M_11664_11744 | CCTGAAAAACACACCCAAAGGGTTCTGATGGAACACAGCACGAATCCCATGTTGGCAGGTGTATTTGTAGAAAAGTTCTT   |
| NC_025343_Sosuga_2012_M_11745_11825 | CAGCGAAGAATTAGATCTTGCAAAGTCTTGCTAGACAGGCCCATGGTAATGCCGAGAGTAGCACACATTATTGTCGAAC    |
| NC_025343_Sosuga_2012_M_11826_11906 | GACATCATGTGGTCGGAGAAAGCAAGTACAGGGTTACCTAGACACCACAAGAACAATGATCAAACACGCCATTACAAAAC   |
| NC_025343_Sosuga_2012_M_11907_11987 | ACCACCGAGCTTCAGAAAATTAGAGAAAATTATAAATTATAATAAATTGTACTTGGGTTACAATTTGGAAATGATACAAA   |
| NC_025343_Sosuga_2012_M_11988_12068 | GCCAGTTGGGGGTAGACAAAAGATGATAGAGATAGCTCACATCTCAGATTTATGCAGTATAGATATCTCAAAGATATTAA   |
| NC_025343_Sosuga_2012_M_12069_12149 | GAGAATCTCTTGGTCGAGCTTGCTCACAGGGAGACCGTTGGAAGGTCTAGAAACACCCGATCCAATTGAACTCATTATG    |
| NC_025343_Sosuga_2012_M_12150_12230 | GTCACTGATTGATGGTTGCAATATCTGTCAACATTGTTTATCTGGGGACAGGAAATTCACCTGGTTTTTATCCCTTCAG    |
| NC_025343_Sosuga_2012_M_12231_12311 | GATAGAACTGGACACCCCCCTGAAGACAACCTCCAATGAGAGTCCCATATGTGGGTTCAAGGACAGATGAGCGGAGAG     |
| NC_025343_Sosuga_2012_M_12312_12392 | GGCATCAATTGGATATGTCAAAGGGGCTTCACCATCACTTAAATCGGCTCTAAGGCTTGCAAGCGGTGTACATCTGGGCTT  |
| NC_025343_Sosuga_2012_M_12393_12473 | CGGAGATACTGAGAACAAATTGGGAAGATGCACTGGATCTTGCAAATACTAGAGTTTATATTGAAATGGACCAACTAAAGA  |
| NC_025343_Sosuga_2012_M_12474_12554 | TCTCACACCAATGCCTACCAGTGCAAACCTCACACACCGATTGGATGATGGCTTGACTCAAATGAAGTTTACTCCTGCTA   |
| NC_025343_Sosuga_2012_M_12555_12635 | TTCGTACGCATATTCTGTTTTGTGCACATCTCCAATGACAACCAAAATTTAGAACAACCTAGACAGGTTGTTAGACTCCA   |
| NC_025343_Sosuga_2012_M_12636_12716 | TCTAATCTATCAGCAAGTGATGATTTTAGGTCTAGGGGTCATTGAGACCTGGCTATCATTTCCGAACCAAATTAATGATG   |
| NC_025343_Sosuga_2012_M_12717_12797 | AGACATCTCTGTCCACCTGCATACAGGGGGTCTTGTTGCATCAGGCCAGTTGACATGTGTGTTCTAAATGAGAGTCCTA    |
| NC_025343_Sosuga_2012_M_12798_12878 | TGTACCTCCGACCTTGAAATGTTCCACACCACAATAAGTTCATCTTTGATTGAGATCCTTTAGACAAAGATCAAATTGAGG  |
| NC_025343_Sosuga_2012_M_12879_12959 | AATTGATAATGTCATGATTCAGTCACGTTTATGTGGAATTGATTGTTAACGATAGAAGAAAGAATCCCACTGCTTGAC     |
| NC_025343_Sosuga_2012_M_12960_13040 | CCTAATTTCAATTGCAATTTGCTCATACGCTGACTGGACTAGATGAGTCAACATCACTCATTAAATGATGCTGTGGTAGATG |
| NC_025343_Sosuga_2012_M_13041_13121 | TGATTATTCAGCAAACCTGGATCAGCGAGTGCCTGAATACATATTAGATAAAGTATTCTATTATACTGCCTGGAATATAA   |
| NC_025343_Sosuga_2012_M_13122_13202 | GCTGGACTTGGCATAACCATGTACTACATGAGGATTATAGGGCTTCATTCCATAATTGACTACCTAAACATAGTTTTAA    |
| NC_025343_Sosuga_2012_M_13203_13283 | TAGGATCCCAGGGTTGGCACTGACTGGTATATCATCAACTATCAATCATCCCAAATCTTAAGACGACTCATAAACTTGG    |
| NC_025343_Sosuga_2012_M_13284_13364 | AATTCTAGTCCCAAAGAACTCCCCCTATCTTGCAACACTGAACTATCATAAGCTTGCAACAGAAGCAATAATGTGGGGAG   |
| NC_025343_Sosuga_2012_M_13365_13445 | GCACCAGGCTCTAGCAGACATCAGGACTGGAGTTGATATTGAACTTATAATACCATCTGAAGATAGTACAGAATTGTCTG   |
| NC_025343_Sosuga_2012_M_13446_13526 | TAGAACACTGAACCTAGTTGCAAGGAAGTTAACTCTAATAGCAATTGCTATTGCAGATAATCCAAATTTGCCTTACGTGA   |
| NC_025343_Sosuga_2012_M_13527_13607 | GGGTTTAGCTCCTGATCAGAAGTGCAAGGTACTCACTGAATACCTACTAGTCCAGGTGAAGCTTTTAACTGCTGAACCAAG  |
| NC_025343_Sosuga_2012_M_13608_13688 | GAAGCTTGCTATGTGGAAGACAGTAATCTGTGAGCCAAAAATGCTGCATTCCTCACAACTGTACTATTTAACTAGAA      |
| NC_025343_Sosuga_2012_M_13689_13769 | GATTTTGAATTCGATAAGGGAATCACCCTGGGGCAGACCTTAATAGATCAATTTTATAGCAGTTTTGGTTTTTTAGAGT    |
| NC_025343_Sosuga_2012_M_13770_13850 | AGACCCAAACATGACCTTAATGAATCTGGCATCAAATTTGGGCGGTGAATTTAGAGTCTAACTGTGTTTCGATGTCTCCA   |
| NC_025343_Sosuga_2012_M_13851_13931 | GGATATTTATAAGGAGTCAGATGATAACGAGAGATACCACTATCCATTCCTGAGCCAGGACTCAGTGGATCAGACCGCAA   |
| NC_025343_Sosuga_2012_M_13932_14012 | ATTTGCAGCCCCGCTACGCATCATATTTAGAGGCCATTGGACTCTCCTCCACCTCTTGGTACAAAGGAATTTCAATAA     |
| NC_025343_Sosuga_2012_M_14013_14093 | CAATTATTTGGCAAATAAAAGAGTTCCTCTGGGCAATCATCTTTATCTGGCAGAGGGTAGTGGGGCACTAATGACCATAA   |

|                                     |                                                                                    |
|-------------------------------------|------------------------------------------------------------------------------------|
| NC_025343_Sosuga_2012_M_14094_14174 | TGAAGCTTACTATCCAGGAGAGAAGATATATTACAACAGCTTCTTCTCAAGCGGCCAATGCCCCCTCAGAGAACTTCC     |
| NC_025343_Sosuga_2012_M_14175_14255 | ACCTCTTCCCACACAATTCAGTGAAGATCATCTATCAACATCTAATTAATAATATTCCTTGTGAATTGGGCTTTGTTC     |
| NC_025343_Sosuga_2012_M_14256_14336 | AGAGTTCTTACCCTCTGGAGCGGAAATAGTAAACAGACTGACTTAAGCAAGAGAGAGTGTGTTGAGTTTATATTGAGTC    |
| NC_025343_Sosuga_2012_M_14337_14417 | AGTCTCCACAGGGACAGTGTCACTACTAGTATGTGATTAGAGGAAGGGTTCATATCGAACAACTGTGATCTATCCTGTG    |
| NC_025343_Sosuga_2012_M_14418_14498 | ATTGATACATGTTTACTATTATCTTTCATGTTAATAATGGATAATGGATTACTTATCTCTAAAATCAGACCTAGAACCAT   |
| NC_025343_Sosuga_2012_M_14499_14579 | CCAAAAGCTGTCTACAATAGTATCCATCCTGTCATACAGGTTCAAAAATATTACCTTAGCAAGATCAGCATACTCTGACC   |
| NC_025343_Sosuga_2012_M_14580_14660 | TCAAAGTAGTGAAGTATTCTGATTGTCCTTGCTGGACCAGAGAAAACCGTTGGGACATTCAATGTGGCAAGAGCCCTTG    |
| NC_025343_Sosuga_2012_M_14661_14741 | ACAACAGGATAAGATGGATGGGTTCTCATTGATAAATCCATGTGTTCTCAAGGATCTGCGGGAGGAGATGGCTGAATCAT   |
| NC_025343_Sosuga_2012_M_14742_14822 | CAATAATGTAATTGATGTGATCGATATGCAGCTTAAATGGCACATGCACCTTGAGAATCAAGACGATCATGTACTGCTAT   |
| NC_025343_Sosuga_2012_M_14823_14903 | AAGGCTAGGCAGCAGATCACAGACAAACAGCTACTCCAAACACCACAAGCCAACACTATCCAAGAAGTCATTGAAAGAA    |
| NC_025343_Sosuga_2012_M_14904_14984 | AGCCAACCTGGTTACTATATACTTGAAGGAGACACTGACTACAATTGAATCTTACAATGAAGACAGAACCAGGCTCCTAT   |
| NC_025343_Sosuga_2012_M_14985_15065 | TCTAGCATATAATATTTTCGGCTTTCGGAAAAATTAGAACATCAGCCCAATTGACAGCCAGGGCCGCTACTGGATATCGTGA |
| NC_025343_Sosuga_2012_M_15066_15146 | TAGAACTGGCCTATAATTGATTTCATATGAGGAAAGTTGTGATAGCTTCTTTGAAGTTGGGTGAATTCAGTGTAAGTC     |
| NC_025343_Sosuga_2012_M_15147_15227 | AGTTTTGACTCCAAAATCATTCTCAGTATCACTCATGCCAGGAAGTATTTTTCACAAAACCTTGACTTGACCAATTGG     |
| NC_025343_Sosuga_2012_M_15228_15308 | TATTGAACTAGGGCAAACCTAAAAGTTCTTCTACCCAGATCAGAGCAAAAACCTTATCTGGAAAAATATCGGCTGCATTA   |
| NC_025343_Sosuga_2012_M_15309_15389 | TTTGATATCTACTCTTGAAGATGATAATAATGATTTCAGGTATGAGCCATACCCAGATGAATCTCAGGACCAGCCCGAGT   |
| NC_025343_Sosuga_2012_M_15390_15470 | CGATCTCGCTGGCGATGAAATCTAATTGACTAGGAAGAGAAAAATGCAGTCTCAGATATTTAAGAAAAAACTTATAGATTT  |
| NC_025343_Sosuga_2012_M_15401_15480 | GGCGATGAAATCTAATTGACTAGGAAGAGAAAAATGCAGTCTCAGATATTTAAGAAAAAACTTATAGATTTTCCCTTGGT   |
| NC_025350_Tuhoko_virus_3_M_0_80     | ACCAGAGGGAAAAATTAAGAAGGGTCTTTCAGTCAGATGAGATTCCTGATTCAGTGGGCCCGGAAGTGGCATAGTTCCGGG  |
| NC_025350_Tuhoko_virus_3_M_81_161   | TCGATTACGACTCTGAATGGTCTCTCCGGAGCTTTAATTGGATAATTCGGTATCGTTGAGGTACAACCAAATTATAGCA    |
| NC_025350_Tuhoko_virus_3_M_162_242  | TCATGGCATCACTCTTCAGAGCCTTGAACAATTTACTCTGGAACAAGATCAAGGCGGTGCGGTAATGTGGGTGACCAG     |
| NC_025350_Tuhoko_virus_3_M_243_323  | CGCCAGAGACTCTCCAGGCAACTATCAAAGTCTTTGTAATTAATACACCTGATCCCCGCTTAAGATATAGGATGATGTGC   |
| NC_025350_Tuhoko_virus_3_M_324_404  | TTTGCTTGCGCCTAATAGTTAGTAACTCTGCAAGGACTGGGCAGAGACATGGAGCTCTCATGACACTGCTCAGCTTGCCA   |
| NC_025350_Tuhoko_virus_3_M_405_485  | CTGCAGTGATGCAAAATCATTTTCGCACTGCAGAGCGATCTCTGACTGCCAAATTGAACGGATTGAAGTTGATGGATTT    |
| NC_025350_Tuhoko_virus_3_M_486_566  | AACCGGGGACTTACAGAATCAGAACAATGCAAGAACCCCTGACCCATGGAGAGGTGGTCGCCCTTGAGGAGATGGCA      |
| NC_025350_Tuhoko_virus_3_M_567_647  | ATGACATCCCAGAAGCTCTAGCAAACACACACCTTTGTGGATGCGCAGACTGAACTCGAAGAATGTGATGAGATGGAA     |
| NC_025350_Tuhoko_virus_3_M_648_728  | AATTCCTTGAGGCGATCTACAGCACCTCATCCAAGTGTGGATAATGGTTACAAAGAGCATGACCGCATTTGACCAACCA    |
| NC_025350_Tuhoko_virus_3_M_729_809  | CAGGGTCAGATGAGCGTAGGGTTGCAAAATACCAGCAACAAGGCAGGCTTAACCCTCATTACCTTCTGCAAGGAGAGGTG   |
| NC_025350_Tuhoko_virus_3_M_810_890  | GTAGGCGGATCCAACATATGCATAAGGCAGAGCCTCCCATAGGCAATTCCTTGTGAATGAATTGCAACAGCAAGCAAC     |
| NC_025350_Tuhoko_virus_3_M_891_971  | AAGGTCCAATTACAGGGAATATTATGCAATGGTGGCGGACATCGGGAAGTATATTGAATGCTGGAATGGGGGGATTCT     |

|                                      |                                                                                   |
|--------------------------------------|-----------------------------------------------------------------------------------|
| NC_025350_Tuhoko_virus_3_M_972_1052  | TCATGACCATCAGATTGCTCTTGACAAAAATGGCCGCCACTTGCACTAGCTGCATTCTCGGGAGAGATAGTTAAGATG    |
| NC_025350_Tuhoko_virus_3_M_1053_1133 | AGAGCCTAATGCTTCAATATAGAAGATTAGGAGACAGGGCAAAATTTATGGCACTGTTGGAAATGTCAGAGATGATGGAT  |
| NC_025350_Tuhoko_virus_3_M_1134_1214 | TTGCACCATCCAACCTCCCACTATTGTATAGTTATGCAATGGGTATAGGGAGTGCCAAGATCCCCAAATGAGGGGCTAC   |
| NC_025350_Tuhoko_virus_3_M_1215_1295 | CATTCCGAAGACCTACCTCAATGCAGCATTTTACCAGCTGGGTGTCGAAACTGCAAAACACAGCAAGGATCTGTAGAC    |
| NC_025350_Tuhoko_virus_3_M_1296_1376 | AAGACATGGCTGCTGAACTTGGGCTAACCGAGGCAGATAAGAGGGCAATGGCAGCAACTGTCACTCGACTCACGACAGGC  |
| NC_025350_Tuhoko_virus_3_M_1377_1457 | GAGGAGGGCTGCAGGGCAACATGGGTATCAATGCCATGGCAAGAAGAGGGCAGCAACTCCCGCAGCCTCAAGACAATGTA  |
| NC_025350_Tuhoko_virus_3_M_1458_1538 | TAGAAGAAGATGAGGAAGAGGATGAGGAAGAGGAAGAACCCAGAATCAAGAGAGGGAGGTAGATCCAGAACTAGAAAGG   |
| NC_025350_Tuhoko_virus_3_M_1539_1619 | GAGTGGCACTCAGGATCGCACAGGATCAAGAGAGGTGGGCCAGGAGGTTGGCTGAAATAGAAGCAGAACGAGTTGCCAGA  |
| NC_025350_Tuhoko_virus_3_M_1620_1700 | AAGCAGCCAGCCATCCACCTCAACATGATGCAACAAGAGATCAAACTACCTGATCAACAAGAATATGATAGCAACCTAATT |
| NC_025350_Tuhoko_virus_3_M_1701_1781 | AGTAGCAAGGCTTACAAACAACGAGCGGGCTTGCGCAAACTGCATCGCAATATATTATGTAGGAGCTTTATGTCTTTAAG  |
| NC_025350_Tuhoko_virus_3_M_1782_1862 | AAAACTATAGTAGGCCCGAAGGTTGGCATCTTCCGGGCTCTCGTGACTTCGGCTCCGAAGTCTTCTTGCCACTCAAC     |
| NC_025350_Tuhoko_virus_3_M_1863_1943 | TAGGACTGATTTTGAATTTGTACCACAACCTCCCAATATGGAACCCACTCCGTGACGCGGAAATCTCCGCATGGATA     |
| NC_025350_Tuhoko_virus_3_M_1944_2024 | AGAAAGGACTAGCTACTGCCAAGCATTTTGCTCCAATCCCGTATCATCAAAAGCAGCTTAGGGAAATCAACAATCAAG    |
| NC_025350_Tuhoko_virus_3_M_2025_2105 | AGGGGAATACCAAAGTCCTCGTCTCATCAGCAGAAACAAATTGCCAGCTCCCAACCCGAGCCAGTCACACCGTCAAGGTT  |
| NC_025350_Tuhoko_virus_3_M_2106_2186 | AAGCTCAAGTCCACCCGCAACAGCCACCGCTTCCCAACCATGCACTGGAGCAAGACCAAAAACAAAGAGAACTGCAACA   |
| NC_025350_Tuhoko_virus_3_M_2187_2267 | CTGCCCGACCCCGTCTGTCCAGCAGGCAGTCAAATAGAGCCTGTATATGAGGATATTGTATCAAATCCCACTCATCAA    |
| NC_025350_Tuhoko_virus_3_M_2268_2348 | CTGAGAATGCACCATTGATTGCAACTCAATCATCTGCAAAGCAGTCACTGCTGTGTACTGAGCCTCTTCCAGCCAACTT   |
| NC_025350_Tuhoko_virus_3_M_2349_2429 | CTTCCGCTACTCGCTGTGGAGAGCAAAGCTTTAAGAGGGGGCGATTTTCTTCTGTTCCACCGGAAGAGATCCAACAGT    |
| NC_025350_Tuhoko_virus_3_M_2430_2510 | ACCCAGGACACAGACGAGAATTTGATCTTGTGTTGGGGCTCAGGAAAATTTGAGGTCAGAGAATGGTGCAACCCAACCTGC |
| NC_025350_Tuhoko_virus_3_M_2511_2591 | CCCCAATCACTCCAATCCCAGAAGATATCAGTGCCGTTGTGGGGAATGCCCTAGAATCTGCAAAACAGTGTGAGGGAGAT  |
| NC_025350_Tuhoko_virus_3_M_2592_2672 | ATCAGGTACTTGAAAGTCATGGAGGCCAAAATGACACAAATTGAATGGAAAGTGATAAAGTACTGGCTCAGAATAGTCT   |
| NC_025350_Tuhoko_virus_3_M_2673_2753 | ATCCAGCAAGTCAGGAATGAACAGCTGGTGCTCAAAGCTAGCATGGCAACAATTGAAGGATTAATGACAACAATAAAAAAT |
| NC_025350_Tuhoko_virus_3_M_2754_2834 | ATGGATCTGGGGTAGGGCCGGGCGCAACAGCCGCACAAGCCAAAAGATTGTTCAAGGAAGCTCCGGTAGTAGTCAGTGG   |
| NC_025350_Tuhoko_virus_3_M_2835_2915 | CCCATAGTAGGTGACAATGATCTCATCTTTGAGGACAAAATTGAAATCAGTAGTCTTGGGAAACCACAAAAGGTTGCTCC  |
| NC_025350_Tuhoko_virus_3_M_2916_2996 | CAACCAAGAAGCGGCTTGCTACTAGTGAGGCTGACATAGCTGGTTATAAACTCACTCTCAGAAAATTACTAAAAGAGTG   |
| NC_025350_Tuhoko_virus_3_M_2997_3077 | ATCCCAACGCCAATCAGCACAAAAAATTTGAAGATCTGATAGCTAGTGTAAGAATGAAAGTGATTTCAAAGCAGCAAA    |
| NC_025350_Tuhoko_virus_3_M_3078_3158 | AGGGAAATCGTGAGAGCTGCAATCTAGAGATCAGTCAACACCAACTTACAATCTTACCTATTAACTTTAGCTTGTGCCTT  |
| NC_025350_Tuhoko_virus_3_M_3159_3239 | AACCTATAATCTGCTTCTGCATAGCATCTAATCTCTCAAAACAAAAGCATTCTCTTTCGAAACTCACCTGCCAACACA    |
| NC_025350_Tuhoko_virus_3_M_3240_3320 | AAAAAATCATAGCCTGAAGGCCTTTAAGAAAAAAGTAGGCTGGGGTCGAACCCATAGACCCCTAACGTCCCCAACAAATG  |
| NC_025350_Tuhoko_virus_3_M_3321_3401 | CTGGGAGACAGGCTACAATTCCTGTTCCAATCAATTTTGAGAGCCCAAGAACTATCTCAATGCATTCCCAATCGTCCAA   |

|                                      |                                                                                   |
|--------------------------------------|-----------------------------------------------------------------------------------|
| NC_025350_Tuhoko_virus_3_M_3402_3482 | CTGACCCGTCTGTATCTGGAGAAGCCGGAAGCTGCTCAAACAAATCAGATTCAAAGATCTAACCCCTAGGGGATCCACC   |
| NC_025350_Tuhoko_virus_3_M_3483_3563 | AAGCCCCTATCTCATTTGTAACTCATATGGATTCTAAAGCCATTGCGCACTAGGGAGGAGTCTTTCTGAAATGCAC      |
| NC_025350_Tuhoko_virus_3_M_3564_3644 | AACCATCCCAAGCCCCCTGTCTTACAGCTTGCTGCCTCCCTTTTGGAGCTGGTCCGGCCATAGAACACCCAGATAAGATA  |
| NC_025350_Tuhoko_virus_3_M_3645_3725 | TGGATGACCTAGACAAAGTGTATTATAGTGGTTAGAAAGAGTGAAGTACTATTGAGGAGTGTGTGTTTCGATATCCGGAAA |
| NC_025350_Tuhoko_virus_3_M_3726_3806 | TGCCATCCAGCCTATCCCGCCACCAGCTTGCAAGCAACCGTGTCTTTGTGTTGCATCGGATAAATACATCAAGGCTCCG   |
| NC_025350_Tuhoko_virus_3_M_3807_3887 | GTAAGCTGACTTCAGGTATGGATTATACATAACATTGTCTTTCTCTATAACTCACTGCCCGCCAAGTCAAAAATTC      |
| NC_025350_Tuhoko_virus_3_M_3888_3968 | GTGTTCTATGCCTATACAGAGCCTTAGAGCTAAGGTGATGAGGAGTGCCACCTAGAAATTATGATTAAAGTTGACTGT    |
| NC_025350_Tuhoko_virus_3_M_3969_4049 | ACAAAACTACCCGATACCAAGAATCTGATCTATGACCAAGTAATGACATCTGGATGGCATCTATTTGGTTTCATCTG     |
| NC_025350_Tuhoko_virus_3_M_4050_4130 | GCAATTTCTACAAGGGTTCAAAGCCGTTCAAGGAATATGATGATCAGCACTTTGCCTCAAAATGCAGAGCCATGGGTCTA  |
| NC_025350_Tuhoko_virus_3_M_4131_4211 | AAGTAGGCTTAGTAGATTTTTGGGGTCCAACATTTTGGTCAAAGCACATGGTAAGATTCTCACGCAGCAAGACCTTTC    |
| NC_025350_Tuhoko_virus_3_M_4212_4292 | TTGGTAAGCACGGATGGGTCTGCCATCCAATGATGGACTGTGCTCCTGCAATCAGTAAGTCACTTTGGGCATTGAGTATA  |
| NC_025350_Tuhoko_virus_3_M_4293_4373 | CTATCTACAAGTCAACGCTGTTTGAAGCCTCAGACTTAAATCAGATGATTAGAATGACCGACGTTGTGTCCCAAAG      |
| NC_025350_Tuhoko_virus_3_M_4374_4454 | TGAAGATTAACCCAGATATTGCTGGAGTACAGAAGACTCGTGGAACCCGGTAAAGAAATTAGTCACCATTGATTAGCCA   |
| NC_025350_Tuhoko_virus_3_M_4455_4535 | AAATCTGCGCATCCTGTATGGCACTGGAACGCCGTCCCCACATCAGTCAACCCAGAAATCAAAGACATACACATTTCCC   |
| NC_025350_Tuhoko_virus_3_M_4536_4616 | CCCCAAACAACTGTAGTTAATAATCAACCCATCCCATCTGAATGATCATTCTCCTTAATCACGCATATACCTTCAGTT    |
| NC_025350_Tuhoko_virus_3_M_4617_4697 | AAGAAAAAAGTCAAAGAGTCTAAGACTTGAGGAGAAATGAAAGACGGGGGCGAACCATACACGATAGACCCACAGCCA    |
| NC_025350_Tuhoko_virus_3_M_4698_4778 | AGAAGTGTCCATTATAGTTAAATGAACAATGCTCTGGTTAACTATCTTAATTGCCTTAGTTGGGAATCATGAGTCTACTT  |
| NC_025350_Tuhoko_virus_3_M_4779_4859 | CATGAATATAAATTTCTACAATCTTAGGGCAAATAAATCCCAAAGAGATTTCTGAATTTCTATACCAACAACCAC       |
| NC_025350_Tuhoko_virus_3_M_4860_4940 | AAGTTATATGGTAATCAGGTTGGTTCCAACCTCTACAACCTTTCTGTAACAACCTGACTCTGGTAGCATAGTACGTTATC  |
| NC_025350_Tuhoko_virus_3_M_4941_5021 | TAATGCTATTAAGGAGCTAATACAACCCATGGATGAAAAATCAGATGGTTATCATCAATCTTATTCCACAAAGGCGCG    |
| NC_025350_Tuhoko_virus_3_M_5022_5102 | GAAAAGATTTGCTGGAGTGGCTGTAGGTTTAGCTGCTTAGGTGTTGCAGTTGCTGCTCAAGCAACTGCGGCAGTAGCAT   |
| NC_025350_Tuhoko_virus_3_M_5103_5183 | GGTGGAAGCTAGAGCAAATGCAGAAAAATAGCATCCATGTCTCAGTCAATACAAGAACTAACAAAGCAGTAACATCTC    |
| NC_025350_Tuhoko_virus_3_M_5184_5264 | TAGTCAGGCAGTATCTGCAAGTGGCATTGCTATACAAGCCATTCAAACGAGATCAATAATGTGATTATCAATACTAA     |
| NC_025350_Tuhoko_virus_3_M_5265_5345 | CCAAGTCCAATGTGATGTATTAGATGCCCGGTAGGCAACATACTTAATCTATATTAATAAAAGTCACAACAATATTTTC   |
| NC_025350_Tuhoko_virus_3_M_5346_5426 | AAATCAGTTAAACAAACCTGCTCTACAGCGATTATCAACTCAAGCTCTGAGCATGCTTATGCAGTCACTTCATCTTATC   |
| NC_025350_Tuhoko_virus_3_M_5427_5507 | GCGTAATCTTTCATCCTCAGAAAGTGCAATTAATGCAGATTTAAGTATGACCAACTTAATCGAAGCCCAATAGTAGGTA   |
| NC_025350_Tuhoko_virus_3_M_5508_5588 | CAATATGACAAATCTCAATTAGTCCTTGCTGTCTTCATACCTTCTATTGCGAGATTGAATGGCGCGTTGCTCTATGACT   |
| NC_025350_Tuhoko_virus_3_M_5589_5669 | TATTAGTATTACAATCAGCTCAAATCAAACCGAGGTTATGCTACAAATTCCTCATAGGGTTTTAGAGATAGGGAAATAGTC |
| NC_025350_Tuhoko_virus_3_M_5670_5750 | TTATACATTTGAAGGTACACAGTGTGAGATGACTAAGCTAAATGCTTATTGCTTGACAGCGATGCCATTCCAGTAACTG   |
| NC_025350_Tuhoko_virus_3_M_5751_5831 | ATCTCTTAGAGACTGTATGAACGGGTGTTTAGTCAATGTGGATTGTGAAGGATAATTGGTTCTTTCGCTAATAGATTGG   |

|                                      |                                                                                   |
|--------------------------------------|-----------------------------------------------------------------------------------|
| NC_025350_Tuhoko_virus_3_M_5832_5912 | GAGTGTGAACGGGGTAATATATGCAAATTGCAAACACCTTACTTGTCTTGCCTACAGCCTGATGAAATTTACTACTCAAG  |
| NC_025350_Tuhoko_virus_3_M_5913_5993 | CACTAATGTCCATTAACTATAATAGATACAAAGAGATGTACAAAAATAAGTTTAGGGCATCTGACATTTACCATAAGAG   |
| NC_025350_Tuhoko_virus_3_M_5994_6074 | GTACGCAAATGTAACCTACTCACTCAGGACTGAAATAGCAAATCTCAAATCACTGTAGTGAGCCCTTTGGATTATCTT    |
| NC_025350_Tuhoko_virus_3_M_6075_6155 | ACAATTGACCACAATAAAACATTCACTTGCTGATGCAACAAATCATATTATGAATAGTGATCGTATTTTGGATAGGCTCA  |
| NC_025350_Tuhoko_virus_3_M_6156_6236 | CTCTGGTCTGTATAGCAAATGGGTATAATATTTCTTATATGTGCATCAATTGTATCACTAATAGGACTAGTATTTCTGG   |
| NC_025350_Tuhoko_virus_3_M_6237_6317 | CTTCCTAATTAGAGGGCTTATTTTGAATTAAGATCAAAACACAGATCTAATCTTAATAAGGCTAGCACTTACTCTATTG   |
| NC_025350_Tuhoko_virus_3_M_6318_6398 | TTCTTCAATAGGGTTGACATAAATCTCATCAGTGTCAATTTAATGTCTCATTAACTGTGATTAGTATATAGCTCTATGT   |
| NC_025350_Tuhoko_virus_3_M_6399_6479 | ATAGGTTAGATATGATTTTTAATAAAAACTTGACATTGGAAGCCCTACCCGGGCCCCGACCCAGTCAGCCCTCCAGCCCC  |
| NC_025350_Tuhoko_virus_3_M_6480_6560 | CAGCTCCACACACGGACCCACGACGACATCCAATCATGCACAACAGGACACAATCTGTCAGCAGTATAGACACCTCATCT  |
| NC_025350_Tuhoko_virus_3_M_6561_6641 | ATGTCTATCTCCCTCGGAGAAAGAAGCCGTCACAAAATTCACATTTAAGAAAACTTCCGAGTTCTAATCTTAACACTC    |
| NC_025350_Tuhoko_virus_3_M_6642_6722 | TACTATCAATTATTATAATCATAGCAGTAATCTTCCAAAAATTGACCACATCAGAGAAACATGCGATAACAGTCAAATA   |
| NC_025350_Tuhoko_virus_3_M_6723_6803 | TGGAAACAATTACCAATCAAACTCGGAAATCAAGAACCTGATTAACCTCTGCTATCACTAACCTTAATGTATTATAACA   |
| NC_025350_Tuhoko_virus_3_M_6804_6884 | CGACTACAGTTGATTTACCAATTAAGCTTAATAATTTGGAAAGAGTATTGTGGACCAGGTAACAATGATGGTCAGACAA   |
| NC_025350_Tuhoko_virus_3_M_6885_6965 | GTAATGCTGTCTGTCTGGGGCCCTGGAGATCGTCCGACTCAAAATATTGAATTATTCAAAGGTTTATACCACACCTCCCCA |
| NC_025350_Tuhoko_virus_3_M_6966_7046 | CCTCAAATACTTCCACCAAATTGAGCATGATTACTGAAGCATCAAATCCAGATGATATAGTTCCCCGGCCCGGAAACTG   |
| NC_025350_Tuhoko_virus_3_M_7047_7127 | TTGGCTGCACCAGTTTCCATCTTTAGTGTCCATTATGGGTTATGGTGTATGGTCACATGGCTTCTACAGGGAATTGC     |
| NC_025350_Tuhoko_virus_3_M_7128_7208 | GCGGGTCACTCTCCATCAGTGCAGATCATCAGAATAGGTTCAATTGGGACCAATAAGGACGGCACGCCCAAATATGTAATC |
| NC_025350_Tuhoko_virus_3_M_7209_7289 | TAGCCAGTGCATCACTCCAGAGACAACCTAGACTGTATCATTGCTCTGTCCAAATGACATCTATTGGATGCTATATTTA   |
| NC_025350_Tuhoko_virus_3_M_7290_7370 | GCACTACTCCCTCAGTCTCCGAGACAGATGACTATAGTACTATGGGTATAGAGAAAATGAGCATATCCTTCTTATCATTG  |
| NC_025350_Tuhoko_virus_3_M_7371_7451 | ATGGATACTTAACACAGTTGGGTGAGCCAACCTGGATTGGACAATCAAAATTTGTATGCTTTATATCCCGGTCCTGGGTCA |
| NC_025350_Tuhoko_virus_3_M_7452_7532 | GTGTGATCTTTAGGGATTTTTTGATATTTCCCGATGATGGGCGGAATTCGGTTAATGGATGCACAGAAGATGCTCAATAGA |
| NC_025350_Tuhoko_virus_3_M_7533_7613 | ATATCACCTATAGAGGCTTTCCCCAAGTGAGACCTGCACTGAAAGTGAACCTTAAGCTTAAACAGGAAGTAGCAAATATG  |
| NC_025350_Tuhoko_virus_3_M_7614_7694 | TAACAAGTCCTTATTATGGTGAAGTGTTAGTGCTCAACTTCCTCTATGTATGCTCTCTTAGATAATATCCCTGGAGAT    |
| NC_025350_Tuhoko_virus_3_M_7695_7775 | GTTCTGTCCAATTGATTCCGCCGGATAACATGACACTGGAGCAGAATCAAGGCTGTACGTATTAATGGATCACTAATT    |
| NC_025350_Tuhoko_virus_3_M_7776_7856 | TGTACAAAAGAGGGTCATCATGGTGGCGTATACAGAGCTATATCAGATAAATTATAGGGTAAACAATCGTGCAATTCAGG  |
| NC_025350_Tuhoko_virus_3_M_7857_7937 | TGAGGGAATCCGTGAGGATTAATACAACATCCACAAGCAGACCAGGAGTACAAGGGTGCAATCTTGAAAAAGTTTGCCCA  |
| NC_025350_Tuhoko_virus_3_M_7938_8018 | AAGTTTGTGTATCAGGCATCTATCAGAGCCCCGGCATCATATCAGACCCGGTGAATCCAACAAGACAGGAAGAAGGGCTC  |
| NC_025350_Tuhoko_virus_3_M_8019_8099 | TTTATTTCTTGTCTGGACTTCTCCATGAGTTTCGAGGACAGGACCACTGAGCTCATTATGTGATCATTCTACCTGTAGA   |
| NC_025350_Tuhoko_virus_3_M_8100_8180 | TCACATATCCATTGGAGATGATACAATTTTCATAGGATATACGGATTCCAGTTGTTTCATGTCTAGTATCAAGGAAGGA   |
| NC_025350_Tuhoko_virus_3_M_8181_8261 | TTTATTGTATTGCCTTCTTGGAAGTAGATAACCAACCTTACTCCATGATGGCTATTAGGTCTTTATCATATATTCAAT    |

|                                        |                                                                                    |
|----------------------------------------|------------------------------------------------------------------------------------|
| NC_025350_Tuhoko_virus_3_M_8262_8342   | AGTAGAATTGGCCATCAGACTGTTACCCCTTATCTTACAAATTCTCTGCTTGGATTGAGCTTGATTACTTTAAGAAAAAC   |
| NC_025350_Tuhoko_virus_3_M_8343_8423   | ATGGGCCAGAATGGCTGCCACATCGCAGATCATTCTCCCGAGGTCCATTGGATTCTCCAATAGTAGAAAAAAGCTTT      |
| NC_025350_Tuhoko_virus_3_M_8424_8504   | GTATCTCTCCAGCTAGGTGAGTTGCCAATCTTTGATTCTTACTATGAACATGACTTCTTCCCTGAAGTTGACTGGCCGA    |
| NC_025350_Tuhoko_virus_3_M_8505_8585   | AGTCCGAAGAGAGGAAAAACAAGCTATTTTCTAGACTCAACGAGGTGAGAGATAGACTCTTGAGCAAAACTCTTCCGCTA   |
| NC_025350_Tuhoko_virus_3_M_8586_8666   | TACTCGCAAGCTACACCACTCGCTACTGCCAACTCCAATCCCATGGCCCAGATGCATGCCGAATTACACAGTGTTACCA    |
| NC_025350_Tuhoko_virus_3_M_8667_8747   | CAAGCACTCTTTGCAACGATTCACGGATGCTGAGCTTACCATCACACATGCCGCCGAAAGTATCAGTCAAGGTTTGTCTA   |
| NC_025350_Tuhoko_virus_3_M_8748_8828   | TGTGATTAATGAACTAGCAGATAAATTAACAGGTAAATCAGATCTATTCTCAAGGAATATTCAATCATGTATGGACCATT   |
| NC_025350_Tuhoko_virus_3_M_8829_8909   | AAGCCACACCCGCCCAATGGACTGATTGACATTGCCCAAATTGCTCAAAGTACCGACTGGAAGGACAACCTTAATCAGT    |
| NC_025350_Tuhoko_virus_3_M_8910_8990   | GTTCTGATTGCGCACTTAATGAGACAATTGATCATGGACAACAATACAGGGAAGATTTCATTCCACCAATTGAGATTG     |
| NC_025350_Tuhoko_virus_3_M_8991_9071   | TGATAGACAGATGTCTGTAATTTACTCTCCAGAGCTAGTCACAATCTGGATAGGGAAAACTAATCATGTATTCTACTTCA   |
| NC_025350_Tuhoko_virus_3_M_9072_9152   | ATTTGAGATGACATTGATGGTCTGTGACATGTATGAGGGCAGGATGAATGCAATTATGCTTACCACCATGAGTTGTTACT   |
| NC_025350_Tuhoko_virus_3_M_9153_9233   | GTCACCTTTAAGAAACAGGCTTCAAAGATTATACATCTAGTTGATAGCCTGTGTGAAATCATAGGAAATAATGTGTATT    |
| NC_025350_Tuhoko_virus_3_M_9234_9314   | TATTGTGGCATCAATGGAAAGCTTGGTATATGGGAAGATACAACCTTGCAGACCCAGTACCTGATGTTGCTGGTGAGTTCT  |
| NC_025350_Tuhoko_virus_3_M_9315_9395   | CTCCTTCATTACTGAGATGTTATCAGCATTAATTGAAACCAAGATGTTTACAATACAAGAGGCAACAACCTGTCGTAG     |
| NC_025350_Tuhoko_virus_3_M_9396_9476   | GAGAATATCTGAATGCTATGACAATCTCTCACCTGACTTAATTGCAGAGCTTTTATGCCTTATGCGTATGTGGGGACATC   |
| NC_025350_Tuhoko_virus_3_M_9477_9557   | TTCTTGAGTGACAGAGAAAGCTGCAGATAAAGTGAGGAAATCAATGTGTGCGGCAAAAGTAATTGATCTTGAGACCAACT   |
| NC_025350_Tuhoko_virus_3_M_9558_9638   | AAAGACACTTGCATTCTTCCATGGTATCCTTATTAATGGGTATCGCCGGAAGCATAATGGAATTTGGCCAAAATGTACCC   |
| NC_025350_Tuhoko_virus_3_M_9639_9719   | TCCACCCAATGCAAGCCTGAGTCTTGCCGAATTGAAACATGACAATTCAGAATTACCTCACCATTATATATTGCAACATT   |
| NC_025350_Tuhoko_virus_3_M_9720_9800   | GAAAGAGGTAGCATTTCATCCAGTTTCGAAAAGAGTTTGATGCAGATCCTGGAGAGGAGCTCAGCATATTTCATGAAGGACA |
| NC_025350_Tuhoko_virus_3_M_9801_9881   | AGCCATCAGTGCCCCCAAAAAGACTGGATGAGTGTCTTTAGGAGAAGCTTGATAAAGCCAATCTGCGAAAAGCTAGGTG    |
| NC_025350_Tuhoko_virus_3_M_9882_9962   | CCCGCTTCCAATGCTTTTAAATAGAAGACTACTGCTGAACCTTCTTCTGACAGTAACTTTGACCCAGACAAGGAACTTG    |
| NC_025350_Tuhoko_virus_3_M_9963_10043  | ATACGTAACAACCTGGGAGATACTTAGATGATGATTCAATTTTGTGCATCTTACTCATTAAAGGAGAAGGAAATAAAGAGA  |
| NC_025350_Tuhoko_virus_3_M_10044_10124 | AGGAAGGATTTTTGCAAACTTACTAAAAATATGAGATCTTGTCAGGTGATGAGTGAGTCACTATTAGCTAATCATGCTG    |
| NC_025350_Tuhoko_virus_3_M_10125_10205 | GAAATTATTCAAAGAGAATGGTGTGGTCTTAGACAATCTTAATTTGACTAAATCTCTCTGACCATGTCTCAGATTGGCC    |
| NC_025350_Tuhoko_virus_3_M_10206_10286 | GATATCAAAACAGTCACGGAGAAATGTTGCGGAAAATGTAACAGTGATGACCAAGGTGCATAAGAGAAGCAACTTAGCAA   |
| NC_025350_Tuhoko_virus_3_M_10287_10367 | CACAAAAATTCAGTCTAGTCATGGACCATCATCCCTACAACCTGATGAACAATTAGAAATTGCTGCCTTCTTTTGACAA    |
| NC_025350_Tuhoko_virus_3_M_10368_10448 | TGATTTAGAAAAGTACTGTCTAAATTGGAGGTATCAAAGTATTGCAATGTTTGCCAATTCTATGAACCAACTGTATGGAT   |
| NC_025350_Tuhoko_virus_3_M_10449_10529 | TCCCCATCTTTTGTAGTGATACACCCACGCCTGATGAGATCTACACTGTATGTGGGTGATCCATATAACCCACCCAGAA    |
| NC_025350_Tuhoko_virus_3_M_10530_10610 | CATCCACAGCACAGATCTAGATGAGATGAAGAACGAGGGAATTTTCATCGTATCCCCGAGAGGCGGGATAGAAGGGCTAT   |
| NC_025350_Tuhoko_virus_3_M_10611_10691 | TCAAAAACGTGGACAATGATATCAATATCAATCATAATCCTCTCAGCAGCTGAATCTGGTACACGAGTGATGAGTATGG    |

|                                        |                                                                                     |
|----------------------------------------|-------------------------------------------------------------------------------------|
| NC_025350_Tuhoko_virus_3_M_10692_10772 | GCAAGGTGACAACCAGACAATTGCCATAACAACAAAAGTTCCAAGAAGTATCCCTCATAAGGACAAAAAAGGATAGCTT     |
| NC_025350_Tuhoko_virus_3_M_10773_10853 | TGAAAATAGCAAAGCATTCTATTGAGAGACTAAGAGTAAACAATCACCATATGGGCCACCATCTAAAGAGTCAAGAACTA    |
| NC_025350_Tuhoko_virus_3_M_10854_10934 | ATTGAGTTCCAATTTCTTTGTTTATAGCAAGAGGATATTTATCAATGGAAGGATTCTAAACCAATCCCTAAAGAACATGA    |
| NC_025350_Tuhoko_virus_3_M_10935_11015 | CAAAGCAAACCTCATATCAGATGTATTAGGTGAGTGCACCTCAATCATCTTGCTCCAATCTAACTACAACAATTATGAGGT   |
| NC_025350_Tuhoko_virus_3_M_11016_11096 | GACCGAAAATGGGGTTGAGAAAGATATCTGTTACTGGCTAAGTTTCTACCTTTCAATCAAACAATTGACCTTTGATCTAC    |
| NC_025350_Tuhoko_virus_3_M_11097_11177 | GTTCCCTTGACATCTCAATTTGAGGACCCGGTCACAGCAGCTTACCTCAATCATCCACACTTAATTGGGAGAATCTGTG     |
| NC_025350_Tuhoko_virus_3_M_11178_11258 | AATCCCTTCTCAATTGGGAGGTCTTAATTACTATGCTATGAGCCGCTCTTTTGTAGAAACATTGGAGACCTCTAACAT      |
| NC_025350_Tuhoko_virus_3_M_11259_11339 | TGCAACATCTGACCTCAAGCGCTCATAACACACAAAGTGATCCCAGAGTGGTATCTAAGCAATCTTATAAATCGACATC     |
| NC_025350_Tuhoko_virus_3_M_11340_11420 | CGGAGAAGGCGGCTGGAACACTCTTGCACTGACCCCTTATGCACTGAATATTGATTACATCTACCCTCTACTTCATTCC     |
| NC_025350_Tuhoko_virus_3_M_11421_11501 | AAAAAGACATACTCAAAAAGTGCTTATGGAGAACAGCATCAACCCCATGTTATCGGGTGTCTTTTCAGAGAACTCCAGTG    |
| NC_025350_Tuhoko_virus_3_M_11502_11582 | TGAAGAAGCTGCGTTAGCAAGGTTCTTGCTTGATCGGCCGCTTGTTATGCCAAGAGTTGCACACATTGTGATTGAACAGA    |
| NC_025350_Tuhoko_virus_3_M_11583_11663 | ATCTTGCGGCAGAAAGGAGACAGATCCAAGGCTATCTTGACACAAC TAGAACTATGATGAAGCATGCTCTAAATAAGCAAC  |
| NC_025350_Tuhoko_virus_3_M_11664_11744 | TCCTGGCTACCAAAAAGTGAGAGAATAATTGAATACAATCGCCTATACCTAAATTACAATTTGGAAATTATTAAGAAAC     |
| NC_025350_Tuhoko_virus_3_M_11745_11825 | AATCAAGAAGAAAACAAAAATAATAATCAAGGCATCTATGCTTGACCTGTGCAGTATTGACATTTCAAAGCTATTGCGGA    |
| NC_025350_Tuhoko_virus_3_M_11826_11906 | ATTGTCATGGTCTCCACTTCTAGGTGGTCGACCGCTTGAAGGATTGGAAACACCAGACCCGATCGAGTTAATCTTTGGAT    |
| NC_025350_Tuhoko_virus_3_M_11907_11987 | GTTGGTAGATGGTTGCAATATCTGCTACTATTGTTTGGCAGGTGATAAAAAGTTACCTGGTTCTTTATACCTTCGGGCA     |
| NC_025350_Tuhoko_virus_3_M_11988_12068 | CCTTCTGACTCTCCACCAGAAGACAACCCGCCAATGAGAGTGCCTTATGTCGGGTGCGGCACTGATGAGCGTAGAGTTG     |
| NC_025350_Tuhoko_virus_3_M_12069_12149 | TTCAATTGGTTATGTGAAAGGAGCATCTGTCTCTTAAAGTCTGCCCTACGCTGTGCGGGCATATACATCTGGGCATTCTG    |
| NC_025350_Tuhoko_virus_3_M_12150_12230 | TGACACAGAAACGAATTGGGAGGATGCACTAGAGTTAGCCAACACCAGAGTGAATATTAACATGGATCAATTAAGAACTC    |
| NC_025350_Tuhoko_virus_3_M_12231_12311 | CACTCCAATGCCAACCCAGTGCAAACCTTAACCTCATCGGCTTGATGATGGGCTATCTCAAATGAAATTCACACCTGCCAGTT |
| NC_025350_Tuhoko_virus_3_M_12312_12392 | CTATGCCTTTTCTTGTTATGTTTCATATATCAAATGATAATCAGAACTTAGAACAAC TAGACAAGCTGTTAGACTCAAATT  |
| NC_025350_Tuhoko_virus_3_M_12393_12473 | GATATATCAACAGGTTATGATATTAGGACTTGGATTAATTGAAACTTGGCTGGCTGCGCCAAATACAGAAATGAAGAAG     |
| NC_025350_Tuhoko_virus_3_M_12474_12554 | TATATCTGTACATCTGCACACAGGATCCTCATGTTGCATAAGACCTGTAGACATGTGTGTA CTCAATGAACTGAAGCTG    |
| NC_025350_Tuhoko_virus_3_M_12555_12635 | AGTCCCTCATCTACTCGTGCCGCGAGCAAACAAATTTGATTGTGATGACAATCCGTTGGATAATGAGCAAATTGAGATTA    |
| NC_025350_Tuhoko_virus_3_M_12636_12716 | AGACAATGTTATGATACAATCTAGACTGAGTGGAGTTGATTGCTTGACCATTCAAGAGAAGATACCTCTTCTCGCACATC    |
| NC_025350_Tuhoko_virus_3_M_12717_12797 | GATTGCCTTACAGTTTGCCACAGCTTAATTGGCCTGGATGAATCTACCTCGTTAGTGAATGATGCAGTTGTGGATGCGG     |
| NC_025350_Tuhoko_virus_3_M_12798_12878 | TTATGCTGCAAATTGGATTAGTGAATGTTTGAATACTTATTTGGATAGGGTATTTTATTACACAGCATGGAACATCCTAC    |
| NC_025350_Tuhoko_virus_3_M_12879_12959 | TGACCTCTCTTACCAGATGTATTACATGAGGATTACCTCTGTTAATTCGGTGCTAGATTACCTAGGTATTGTCTCGCAA     |
| NC_025350_Tuhoko_virus_3_M_12960_13040 | AATCCCAGGACTTGCTTTAAGTGGAATTGCCTCAACAATTAACCATCTAAATCCTAAGAAGAATGATAAATCTTGAA       |
| NC_025350_Tuhoko_virus_3_M_13041_13121 | CTTGGTCCCATCTAACTCTCTTACCTGGCAACACTCAATTATCACAATTGACAACCTGATGCAATTATGTGGGGTGAC      |

|                                        |                                                                                   |
|----------------------------------------|-----------------------------------------------------------------------------------|
| NC_025350_Tuhoko_virus_3_M_13122_13202 | TCAAGTGCTAGCTGATCTACAATCAGGAAGGGACATTGAAATCATAATACCTTCTGAAGATAGCACTGAACTGAGTGACA  |
| NC_025350_Tuhoko_virus_3_M_13203_13283 | AACTCTGAATTGATAGCTAGAAAATTAACCTCTTATGGCCCTTGAGTTGCACCTGATTGAGCACTTCCTTATGTCAGGG   |
| NC_025350_Tuhoko_virus_3_M_13284_13364 | TCTTCCACCAGATCAGAAATGCAAGGTCTTAACAGATTATCTGTACAGCTTGTTAACCATGACCTCAGATCCAGAAA     |
| NC_025350_Tuhoko_virus_3_M_13365_13445 | CATAAATAGCTGGAGATCAGTTATCCAAATGCCAAAGTTATCAGCATTTCCCCATAATCTATTCTACCTAACTAGGAAAA  |
| NC_025350_Tuhoko_virus_3_M_13446_13526 | GTAAATGCTGTCAGGGACTCGTCTGAAGGACAAGCCTTACTGGAGCAGTTCTATGGGAGCTTCGGATTCTAGAATCTG    |
| NC_025350_Tuhoko_virus_3_M_13527_13607 | TCTAAATGTCCAATTAATGGATCTTGCTTCTGGTTCTCAGGGTGATTCTAAAAGTCTAACAGTATTTGATGTAGTTCAAG  |
| NC_025350_Tuhoko_virus_3_M_13608_13688 | ATTGTTCAACTCGGCACATAATGTAGAACGATTGTGCTTTCCTACAGGAGACATCCAATTAGACCTAGAGCCGATAGGTC  |
| NC_025350_Tuhoko_virus_3_M_13689_13769 | TGTCACACCGCCAACCTCATCATGCTCTAAGGCCAATTGGCCTCTCATCAACATCATGGTACAAGGGCATCACTGATCA   |
| NC_025350_Tuhoko_virus_3_M_13770_13850 | TTATCTTAAAGGTCTTAACTGCCCATAGGTGATCATCTTTATTAGCTGAGGGAAGTGGGGCAATAATGACCATAATTG    |
| NC_025350_Tuhoko_virus_3_M_13851_13931 | AGCATACTTCCTGGAGAGCACATATTTTACAATAGTTTTTTCACAAGTGGGCAATGCCCTCCACAGAGAAATTTCCAGC   |
| NC_025350_Tuhoko_virus_3_M_13932_14012 | AATGCCTACACAGTTTACTGAGAGCATAGTGACCAGCATTTGCAAAATGACATACCCTGTGATATGGGATTGTACAAG    |
| NC_025350_Tuhoko_virus_3_M_14013_14093 | CTTCATCCCATTGTGGAGTGAAACAGTAAACAAACTGATTGAGTCGTAAGGAGTGTGTCAATTTATCCTAGATAGAA     |
| NC_025350_Tuhoko_virus_3_M_14094_14174 | ACCTTCTTCTACAGTCTCAATACTCTCCTGTGATTAGAAGAGGGCTTTATAAGTAATCCAAACGAGTTATCTTCAGCCC   |
| NC_025350_Tuhoko_virus_3_M_14175_14255 | ACTTCATGTACTGTTATTATCATTCATTCTTGTCAAAGAGTCAGGTGTGACAATACTTAAACTGACTTAATGCCGTTCT   |
| NC_025350_Tuhoko_virus_3_M_14256_14336 | AAAATTGTCAAACTTGTTACAATACTAAGTCACAGATACACCAAGATTGATGCTGTGAGATCAGCCTACTCTGATCCTT   |
| NC_025350_Tuhoko_virus_3_M_14337_14417 | TCATCATGAAATCTTCTTAGTGTGATTGCTGGTCCCGGGATGGGTATTGGGGAATTCATATGGCTCTGCACAAAGCAA    |
| NC_025350_Tuhoko_virus_3_M_14418_14498 | TACTGATGCACAGCAAGGTTTCTCAATCATCAATCCGCTTCGTCATCATGAACCTTCTCATATGACTGCAGATTCGTCTA  |
| NC_025350_Tuhoko_virus_3_M_14499_14579 | TAACGTGATGGACATAATAGATATGCAAATCAAATTGGCTCAGGCGTCCGAGAATGAAGATGATCATATCCTGCTGTCTA  |
| NC_025350_Tuhoko_virus_3_M_14580_14660 | ACTGGGTTGCAGATCCCAGACAGATAAGCTACTGTCAATTAAAGCATCAAAGAGTATGGACGAGTTCCTTCATAGAGTGG  |
| NC_025350_Tuhoko_virus_3_M_14661_14741 | ATCACTTATCACTGTGTATCTAAAAGAATCCATCAACATCATTGAGTCTTACAATGAAGATCGGACTAGACTAATCTTTA  |
| NC_025350_Tuhoko_virus_3_M_14742_14822 | GGCCTATAATGTATCAGCTTATGGGAAAATTAACCTCAGCCAAAATATGTGCAAAGACAATTCTTGACATAACTATCC    |
| NC_025350_Tuhoko_virus_3_M_14823_14903 | AAATTGGACACTCCTCGGATTCCTCTCAGAAAGCTGGTTGCTGCCAGTCTAAGGCTAGGAGAATTTTCAGCAGGCCTTG   |
| NC_025350_Tuhoko_virus_3_M_14904_14984 | AATTAATGCAAAAGATTTTCTTCAAGATCTAATGCTAGGAAATATATTAAGACTTCAGTAGGATTAGAACAATTGGATA   |
| NC_025350_Tuhoko_virus_3_M_14985_15065 | TGAGCTATCCCAAAATTTGAGGCTATTGCTTAGCAGAGCTGAACAGAAGACTGTCTGGAAACAGATTGGAGCCATCAATC  |
| NC_025350_Tuhoko_virus_3_M_15066_15146 | GGTTAGTTCTCTCAGAAATGATTGAGATACTCTCTGGGGTGATGCATACCTAGAGGACGAACCAGAGCAACCTGAATTCTG |
| NC_025350_Tuhoko_virus_3_M_15147_15227 | TATCGCTGGCGAAGAAATTTAGAAAAGATGCAAGGTAAAATGCAAGCTAATGCAGTTTAAGAAAAAATTATTGATTTCC   |
| NC_025350_Tuhoko_virus_3_M_15155_15234 | GGCGAAGAAATTTAGAAAAGATGCAAGGTAAAATGCAAGCTAATGCAGTTTAAGAAAAAATTATTGATTTCCCTTGGT    |
