# Supplementary material for: Sosuga Virus Detected in Egyptian Rousette Bats (Rousettus aegyptiacus) in Sierra Leone
Source: MDPI journal article supplement (doi:10.3390/v16040648), 2024-04-22
Supplement: s1 [file s1]

Table S2. Bats captured and tested for Sosuga virus (SOSV) in Sierra Leone. Of the 404 Egyptian rousette bats (ERB) captured, 27 were not sampled and tested for SOSV and therefore not used in the analyses of the 377 ERBs reported in the results. Only the ERBs had detectable SOSV RNA.

| <b>Species</b>                   | <b>Number captured</b> |
|----------------------------------|------------------------|
| <i>Eidolon helvum</i>            | 101                    |
| <i>Epomophorus gambianus</i>     | 61                     |
| <i>Epomops buettikoferi</i>      | 481                    |
| <i>Hipposideros abae</i>         | 114                    |
| <i>Hipposideros beatus</i>       | 1                      |
| <i>Hipposideros caffer</i>       | 30                     |
| <i>Hipposideros camerunensis</i> | 1                      |
| <i>Hipposideros cyclops</i>      | 7                      |
| <i>Hipposideros fuliginosus</i>  | 36                     |
| <i>Hipposideros gigas</i>        | 2                      |
| <i>Hipposideros ruber</i>        | 123                    |
| <i>Hypsignathus monstrosus</i>   | 114                    |
| <i>Lissonycteris angolensis</i>  | 5                      |
| <i>Megaloglossus woermanni</i>   | 16                     |
| <i>Micropteropus pusillus</i>    | 2                      |
| <i>Mops condylurus</i>           | 127                    |
| <i>Myonycteris torquata</i>      | 61                     |
| <i>Nanonycteris veldkampii</i>   | 13                     |
| <i>Neoromicia somalica</i>       | 1                      |
| <i>Rhinolophus landeri</i>       | 31                     |
| <i>Rousettus aegyptiacus</i>     | 404                    |
| <i>Scotophilus nigrita</i>       | 1                      |
| <b>Total</b>                     | <b>1732</b>            |
