# Supplementary material for: Sosuga Virus Detected in Egyptian Rousette Bats (Rousettus aegyptiacus) in Sierra Leone
Source: MDPI journal article supplement (doi:10.3390/v16040648), 2024-04-22
Supplement: s1 [file s1]

Table S3. GenBank accession numbers for the Sosuga virus (SOSV) sequences and sequence fragments. Human and bat SOSV sequences are listed by species, location, unique field identification (ID), either whole genome (WG) or by hemagglutinin neuraminidase (HN) and nucleoprotein (NP) genes, and their GenBank accession numbers.

| GenBank Accession Numbers    |                          |          |          |          |          |
|------------------------------|--------------------------|----------|----------|----------|----------|
| Species                      | Location                 | Field ID | WG       | HN       | NP       |
| <i>Homo sapiens</i>          | South Sudan, Uganda, USA | ---      | NC025343 | ---      | ---      |
| <i>Rousettus aegyptiacus</i> | Sierra Leone             | Bat-1021 | PP646291 | ---      | ---      |
|                              | Uganda                   | Bat-926  | ---      | ---      | KP150641 |
|                              | Uganda                   | Bat-1271 | ---      | KP150639 | KP150651 |
|                              | Uganda                   | Bat-1302 | ---      | ---      | KP150642 |
|                              | Uganda                   | Bat-1319 | ---      | KP150638 | KP150643 |
|                              | Uganda                   | Bat-1392 | ---      | ---      | KP150649 |
|                              | Uganda                   | Bat-1516 | ---      | ---      | KP150644 |
|                              | Uganda                   | Bat-1541 | ---      | ---      | KP150645 |
|                              | Uganda                   | Bat-1571 | ---      | ---      | KP150646 |
|                              | Uganda                   | Bat-1605 | ---      | KP150637 | KP150647 |
|                              | Uganda                   | Bat-1624 | ---      | KP150640 | KP150648 |
|                              | Uganda                   | Bat-1450 | ---      | ---      | KP150650 |

--- indicates no sequence.
